# Supplementary material for: Staphylococcus aureus uses the ArlRS and MgrA cascade to regulate immune evasion during skin infection
Source: PubMed Central journal article supplement (PMC8450000; doi:10.1016/j.celrep.2021.109462), 2021-07-27
Supplement: NIHMS1728475-supplement-1.pdf [file NIHMS1728475-supplement-1.pdf]

Cell Reports, Volume 36

**Supplemental information**

***Staphylococcus aureus* uses  
the ArIRS and MgrA cascade to regulate  
immune evasion during skin infection**

**Jakub M. Kwiecinski, Rachel M. Kratofil, Corey P. Parlet, Bas G.J. Surewaard, Paul Kubes, and Alexander R. Horswill**

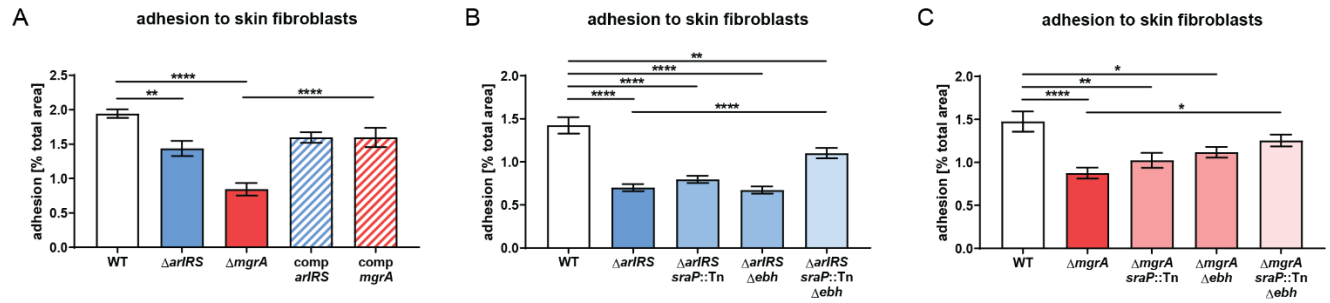

**Figure S1. ArlRS and MgrA control *S. aureus* adhesion to dermal fibroblasts.** Adhesion of fluorescent *S. aureus* to mouse dermal fibroblasts cultured *in vitro* was measured depending on mutations in ArlRS-MgrA regulatory system (A), or on presence of giant surface proteins Ebh and SraP, de-repressed in the  $\Delta arlRS$  mutant (B) and the  $\Delta mgrA$  mutant (C). n = 10 (A); = 15 (B-C). *p* values = \* <0.05, \*\* <0.01, \*\*\*\* <0.0001. All significant *p* values between the groups are marked on graphs. Related to Figure 1.

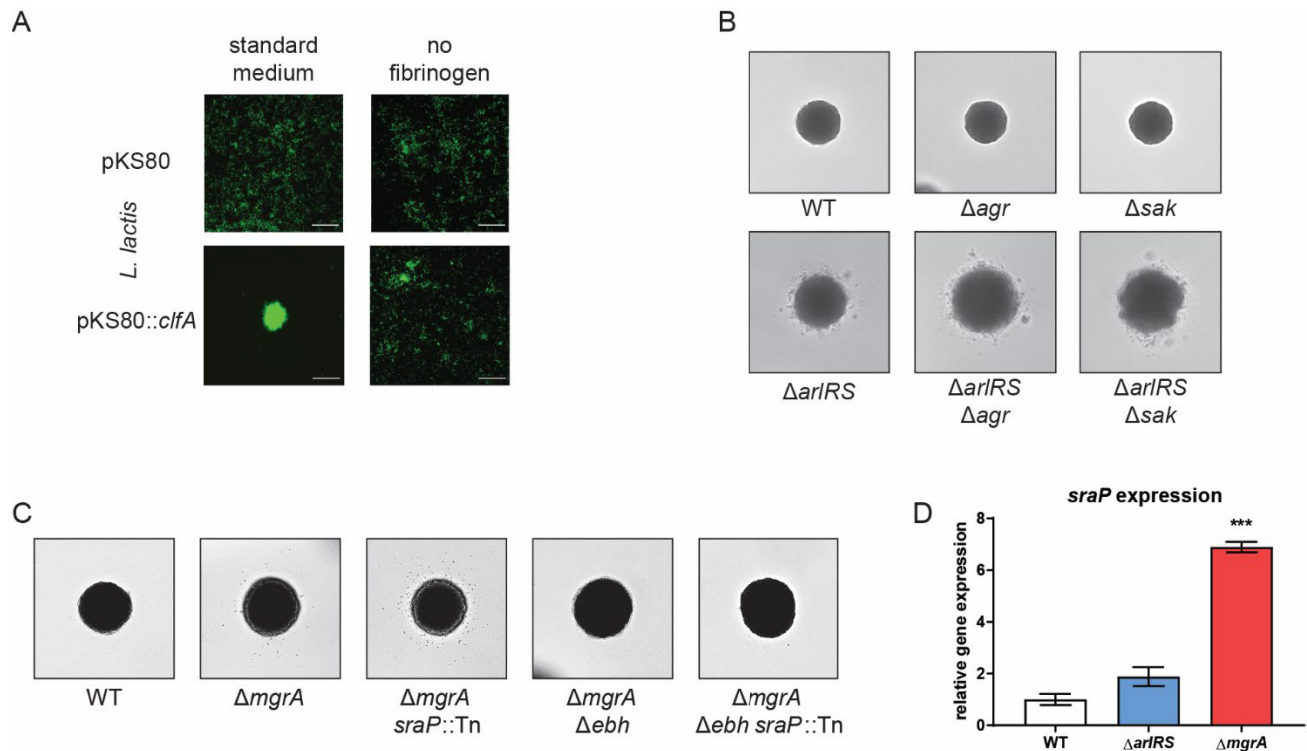

**Figure S2. Binding of fibrinogen is necessary for formation of model *in vitro* *S. aureus* abscess communities.**

Model 3-dimensional staphylococcal abscess communities were formed in collagen/fibrinogen/RPMI gels.

Representative images from experiments with abscess community formation by *L. lactis* heterologously expressing ClfA, stained with Syto9, are shown (A). Scale bar = 100  $\mu$ m. Representative images from experiments determining effect of combined mutations in *agr*, *sak*, and *arlRS* in *S. aureus* this system are shown. Image size: 350 $\times$ 350  $\mu$ m

(B). Representative images demonstrating the role of giant surface proteins SraP and Ebh in causing the “starburst”

phenotype in the  $\Delta mgrA$  mutant strains. Image size: 350 $\times$ 350  $\mu$ m (C). Expression of *sraP* in mid-exponential *S.*

*aureus* RPMI culture was measured with qPCR and normalized to *gyrB* expression (D). n = 3 (D). p values = \*\*\*

<0.001. Related to Figure 2.

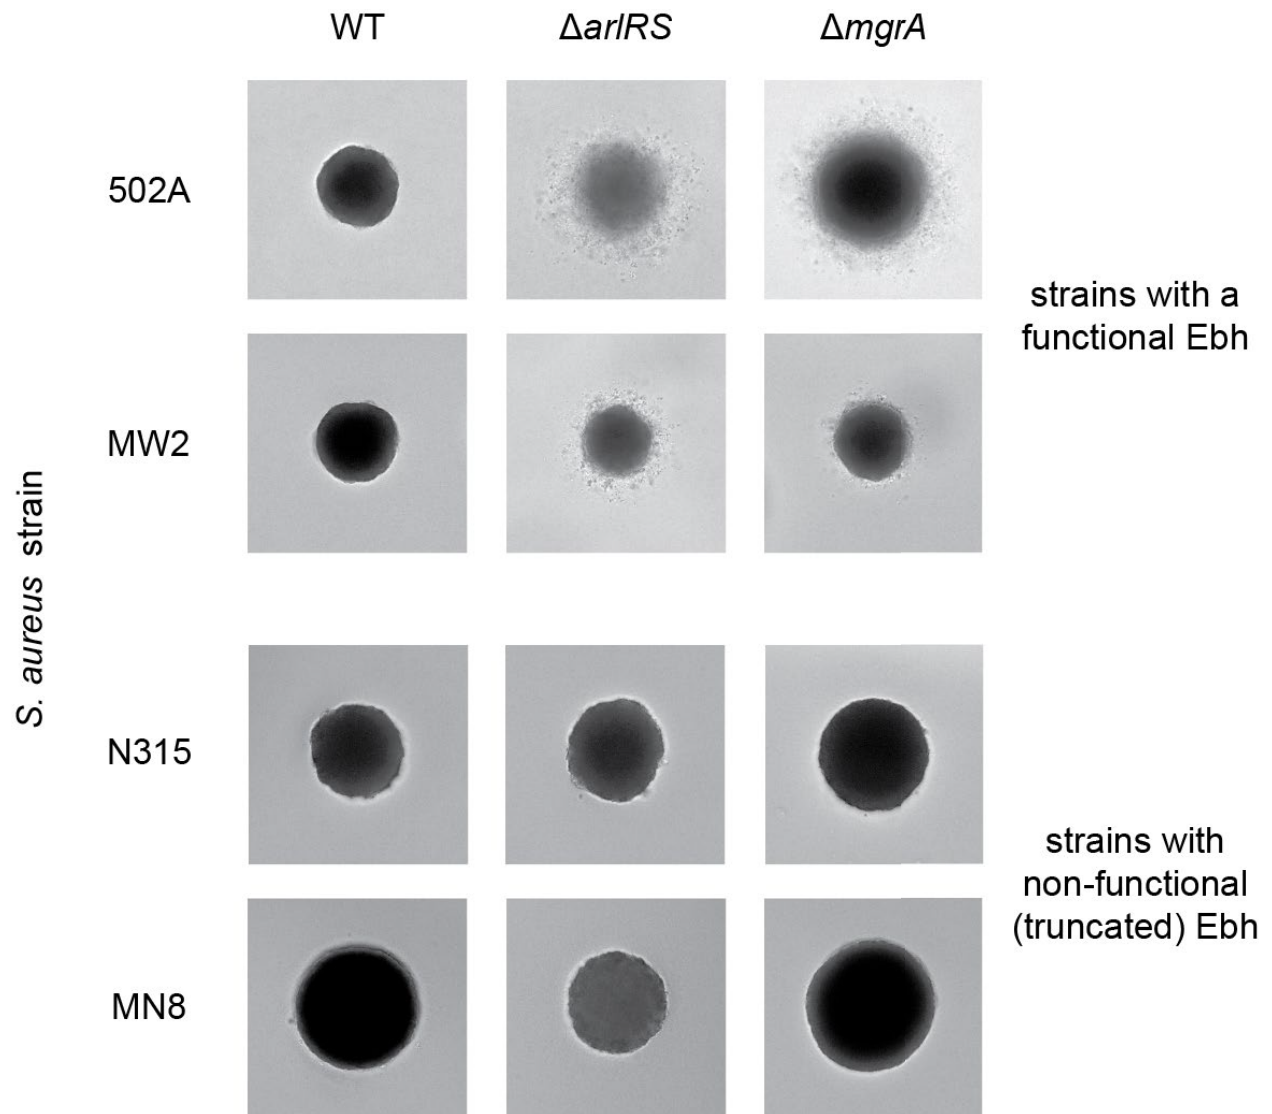

**Figure S3. ArIRS regulates formation of model *in vitro* *S. aureus* abscess communities in various *S. aureus* strains.** 3-dimensional staphylococcal abscess communities were formed from individual *S. aureus* cells belonging to different strains after culturing in collagen/fibrinogen/RPMI gels for 16h. Effect of the  $\Delta arIRS$  and  $\Delta mgrA$  mutations on strains possessing whole-length functional Ebh giant surface protein (strains 502A, MW2), and on strains having only truncated Ebh (N315, MN8) are shown. Representative images, image size: 350×350  $\mu\text{m}$ . Related to Figure 2.

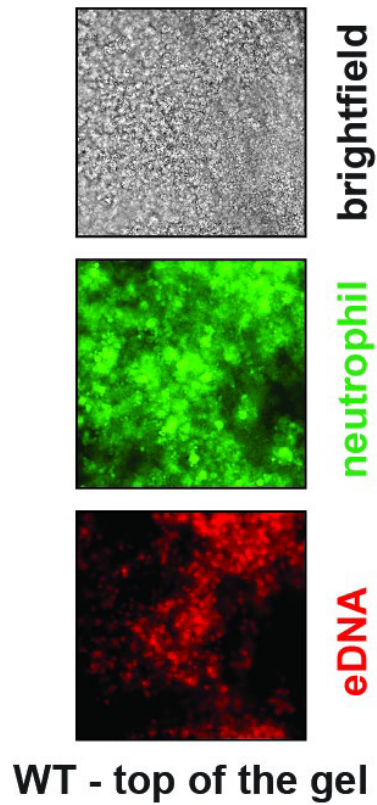

**Figure S4. Neutrophils do not penetrate into gel with embedded 3-dimensional *S. aureus* abscess communities formed by WT strain.** Human neutrophils (stained green with CFDA-SE) were added to 3-dimensional staphylococcal abscess communities formed by MRSA WT strain in collagen/fibrinogen/RPMI gel. After 3h co-incubation, propidium iodide was added to visualize extracellular DNA (eDNA) and dead cells. Images from the layer immediately above the gel were taken to visualize neutrophils that did not penetrate into the gel. Representative images are shown. Image size: 350×350  $\mu\text{m}$ . Related to Figure 2.

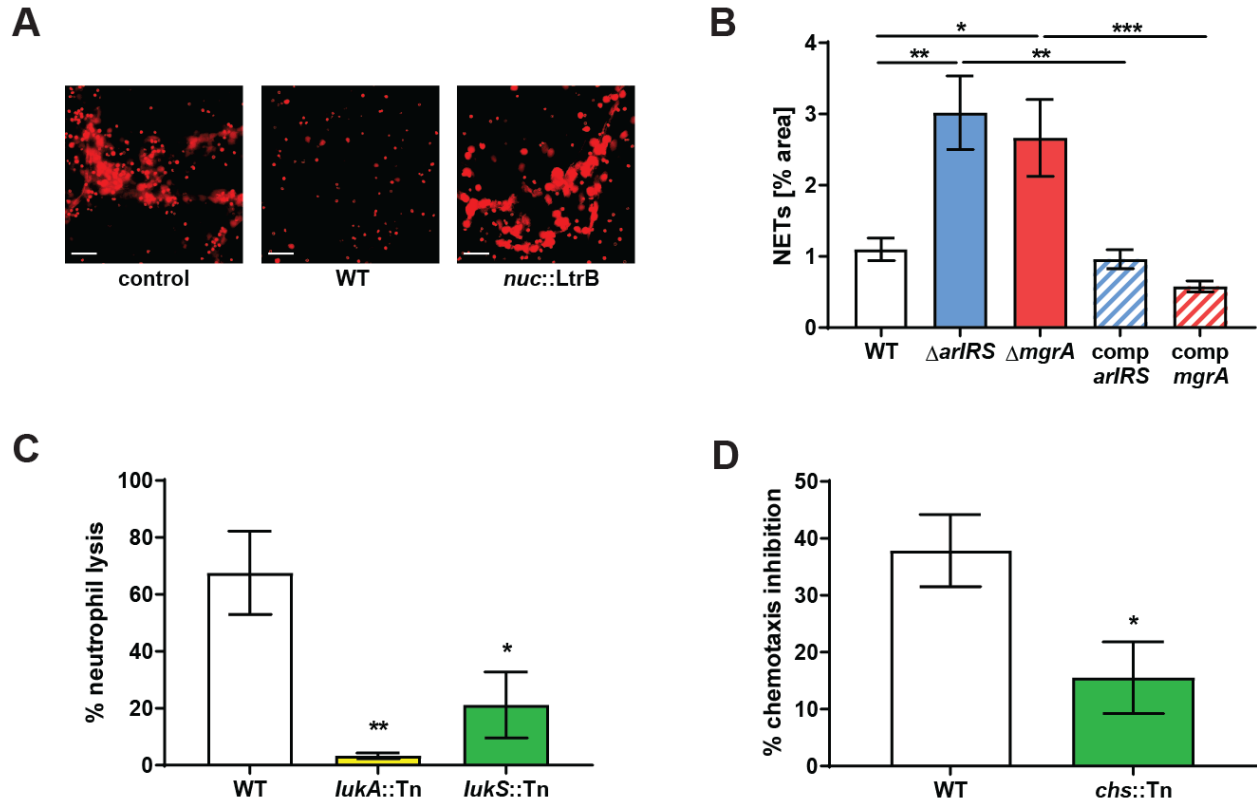

**Figure S5. Innate immune evasion mechanisms employed by *S. aureus* are attributable to specific virulence factors.** The ability of *S. aureus* culture supernatants to digest neutrophil extracellular traps, visualized with propidium iodide (A), to kill human neutrophils (C) and to block neutrophil chemotaxis (D) was measured in WT strain and in mutants lacking selected virulence factors. Additionally, degradation of neutrophil extracellular traps by culture supernatants of *S. aureus* MRSA WT and its  $\Delta arlRS$  and  $\Delta mgrA$  mutants was quantified (B). Representative images are shown. Scale bar = 100  $\mu$ m. Data shown as mean  $\pm$  SEM. n = 8 (B); = 4 (C); = 5 (D). For A, representative images are shown, scale bar = 100  $\mu$ m. *p* values = \* <0.05, \*\* <0.01, \*\*\* <0.001. Related to Figure 3.

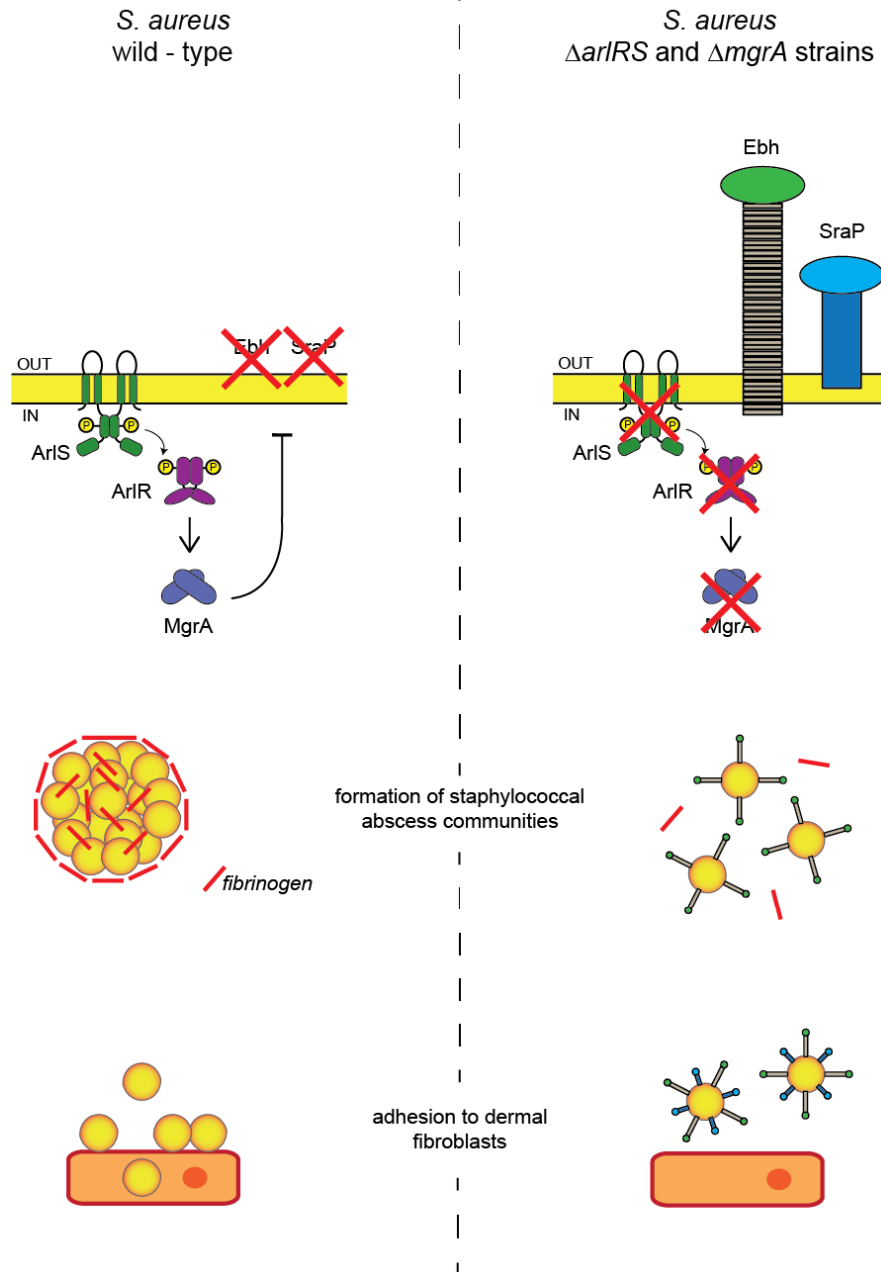

**Figure S6. A model of ArlRS and MgrA affecting spatial organization of *S. aureus* during skin infection.** With a functional ArlRS-MgrA cascade, the large surface proteins with anti-adhesive properties (Ebh, SraP) are repressed during skin infection. This allows *S. aureus* to bind fibrinogen and to organize itself into staphylococcal abscess communities: tight 3-dimensional structures encased in fibrinogen. It also allows *S. aureus* to adhere to host cells in the skin. However, when the ArlRS or MgrA elements of the regulatory cascade are absent, the large proteins Ebh and SraP become de-repressed and appear on staphylococcal surface. By interfering with fibrinogen binding, Ebh prevent formation of a staphylococcal abscess community. The joint inhibitory activity of Ebh and SraP also prevents binding of *S. aureus* to skin fibroblast. Lack of proper spatial organization leaves *S. aureus* in the skin as individual, non-attached cells, susceptible to phagocytosis by host immune cells. Related to Figure 7.

**Supplementary Table 1. Oligonucleotides used in this study.** Related to STAR methods.

| Code                 | Name          | Sequence                                       |
|----------------------|---------------|------------------------------------------------|
| <b>gene deletion</b> |               |                                                |
| JK41                 | sak_A2        | gaggcccttcgtcttcaagaattcggatgatggctgtattaccaag |
| JK42                 | sak_B2        | ctattttgttttaggtaccgagcatggcgcttcctcc          |
| JK43                 | sak_C2        | cgccatgctcgggtacctaacaataatagttgtttattatagaaag |
| JK44                 | sak_D2        | agagcttgcctgcctgcaggtcgacgcactggatgaattctttc   |
| <b>qPCR</b>          |               |                                                |
| JK69                 | chs_qPCR_F1   | caggaatcagtacacaccatc                          |
| JK70                 | chs_qPCR_R1   | gcgttgtaggaagaccactatt                         |
| JK71                 | lukA_qPCR_F2  | agctcaggtgtaaatcgttc                           |
| JK72                 | lukA_qPCR_R2  | gaccagtgtacatgccagtatt                         |
| JK73                 | lukB_qPCR_F2  | ggacatgaccatacagacaat                          |
| JK74                 | lukB_qPCR_R2  | aacccttcagacacagttacag                         |
| JK75                 | scin_qPCR_F3  | aaatctatactgcgggaactt                          |
| JK76                 | scin_qPCR_R3  | aagcttgtagcttagcttg                            |
| HC314                | sraP_1738_for | actgtaggcaatcaaaccataga                        |
| HC315                | sraP_1851_rev | ccgcttggtaatcctgtaact                          |
| HC505                | nuc83_for     | cgaaagggaatacgcgaaag                           |
| HC506                | nuc159_rev    | tgcatctgctgagctacttaga                         |
| HC579                | lukS_up       | ctgcaacattgtcgttaggaataa                       |
| HC580                | lukS_down     | ctcagcgccatcaccaata                            |
| HC581                | lukF_up       | ggcttatcaggtggaggaatg                          |
| HC582                | lukF_down     | gcttcaacatccaaccaattt                          |
| 4252024X             | SA-ebh7908F   | tgcaagaagcgtgaagcagaaac                        |
| 4252023X             | SA-ebh8091R   | ttgttgactgcttgccttaagc                         |
| 41995031X            | SA-gyrBFor    | aacggacgtggtatcccagttgat                       |
| 41995030X            | SA-gyrBRev    | ccgcaaatattaccaccagcatgt                       |
